# Supplementary material for: TLR3-/4-Priming Differentially Promotes Ca2+ Signaling and Cytokine Expression and Ca2+-Dependently Augments Cytokine Release in hMSCs
Source: PubMed Central journal article supplement (PMC4793222; doi:10.1038/srep23103), 2016-03-16
Supplement: srep23103-s1.pdf [file srep23103-s1.pdf]

## Supplemental Figures

### **TLR3-/4-Priming Differentially Promote Ca<sup>2+</sup> Signaling and Cytokine Expression and Ca<sup>2+</sup>-Dependently Augment Cytokine Release in hMSCs**

Kyoung Sun Park<sup>1</sup>, Sun Hwa Kim<sup>1</sup>, Amitabh Das<sup>1</sup>, Shao-Nian Yang<sup>3</sup>,  
Kyoung Hwa Jung<sup>1</sup>, Mi Kyung Kim<sup>2</sup>, Per-Olof Berggren<sup>3</sup>, YoungSeek Lee<sup>1</sup>,  
Jin Choul Chai<sup>1</sup>Hyun Jin Kim<sup>\*2</sup>, YoungGyu Chai<sup>\*1</sup>

<sup>1</sup>Department of Molecular and Life Sciences, Hanyang University, Ansan, Korea

<sup>2</sup>Department of Physiology, Sungkyunkwan University School of Medicine, Suwon, Korea

<sup>3</sup>The Rolf Luft Research Center for Diabetes and Endocrinology, Karolinska Institutet, Karolinska University Hospital L1, SE-171 76 Stockholm, Sweden

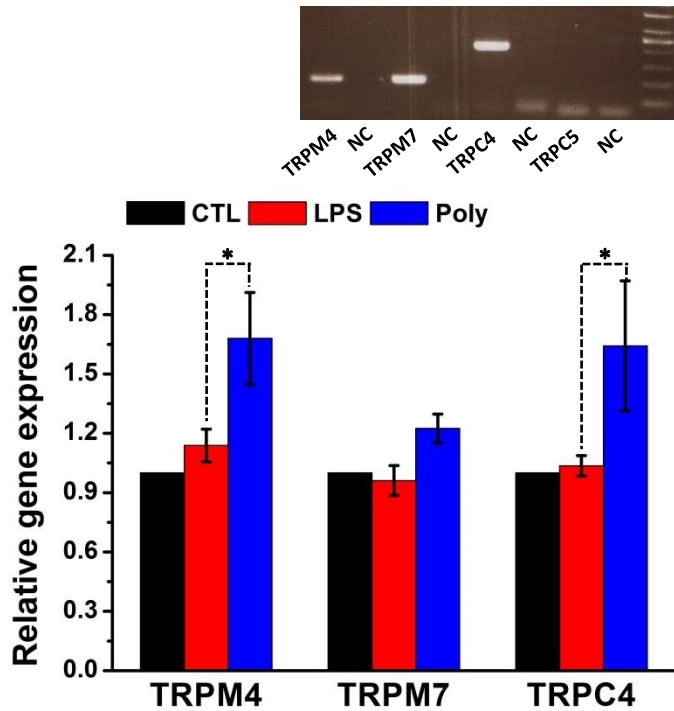

**Figure S1.** Representative RT-PCR blot illustrating mRNA expression of TRPM4, TRPM7 and TRPC4 in control hMSCs. NC denotes negative control with distilled water. Real time RT-PCR quantification showing relative mRNA expression levels of TRPM4, TRPM7 and TRPC4 in control (CTL; n = 5), LPS- (n = 5) and poly (I:C)-treated hMSCs (n = 5).

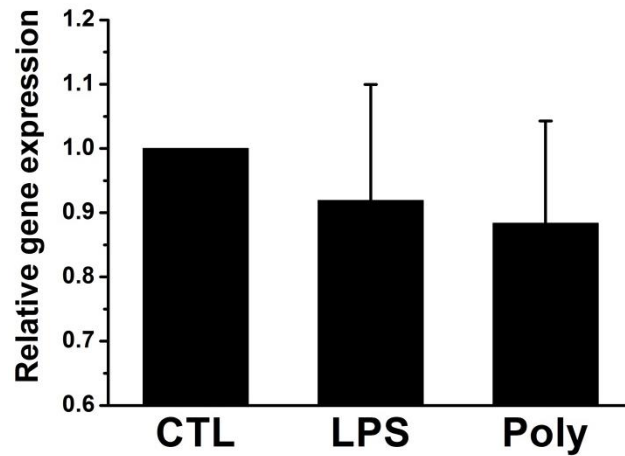

**Figure S2.** Real time RT-PCR quantification showing relative mRNA expression levels of MaxiK in control (CTL; n = 3), LPS- (n = 3) and poly (I:C)-treated hMSCs (n = 3).

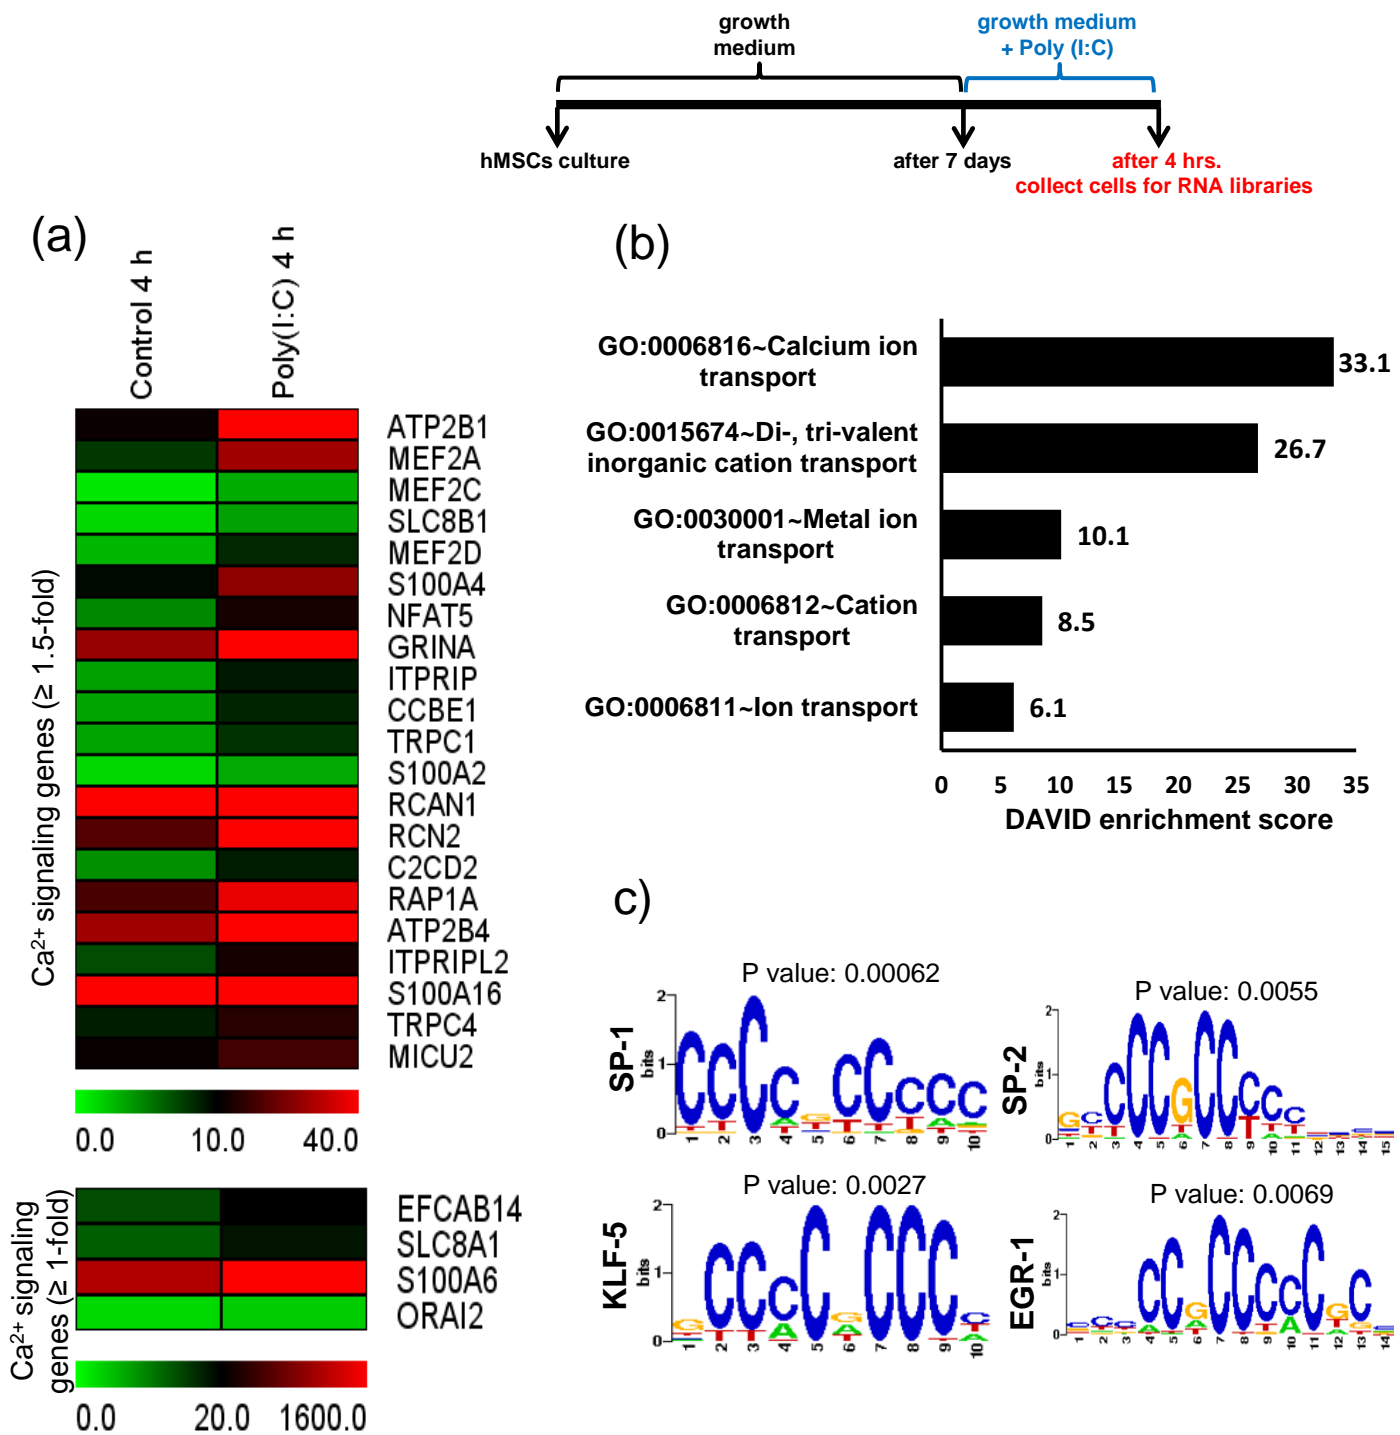

**Figure S3. Transcriptomic analysis of the Poly (I:C)-stimulated Ca<sup>2+</sup> signaling gene expression in hMSCs**

(a) A heat map represents differential expression of Ca<sup>2+</sup> signaling gene expression at 4 h after Poly (I:C) stimulation in hMSCs. (b) Gene ontology analysis of the functional annotations that were associated with Ca<sup>2+</sup> signaling gene expression at 4 h after Poly (I:C) stimulation in hMSCs. (c) Patterns of transcription factor motif enrichments within the promoters of the Ca<sup>2+</sup> signaling genes in Poly (I:C)-stimulated hMSCs.

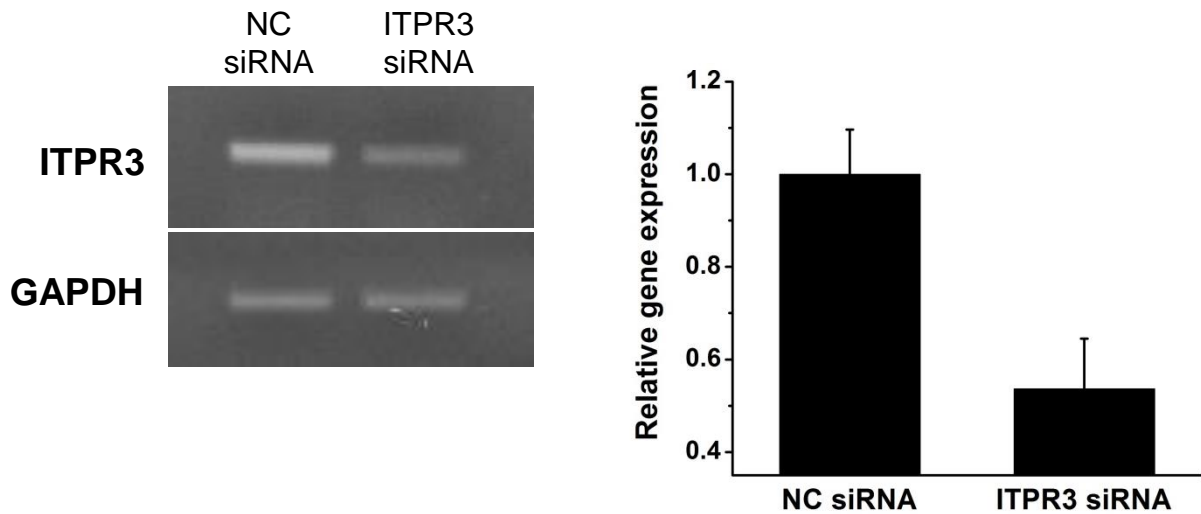

**Figure S4.** Representative RT-PCR blot and real time RT-PCR quantification showing relative mRNA expression levels of ITPR3 in scrambled siRNA control (NC, n = 2) and ITPR3 siRNA treated hMSCs for 48 hours (n = 2).
